# Supplementary material for: Celastrol Downmodulates Alpha-Synuclein-Specific T Cell Responses by Mediating Antigen Trafficking in Dendritic Cells
Source: PubMed Central journal article supplement (PMC8926036; doi:10.3389/fimmu.2022.833515), 2022-03-02
Supplement: Image_1.pdf [file Image_1.pdf]

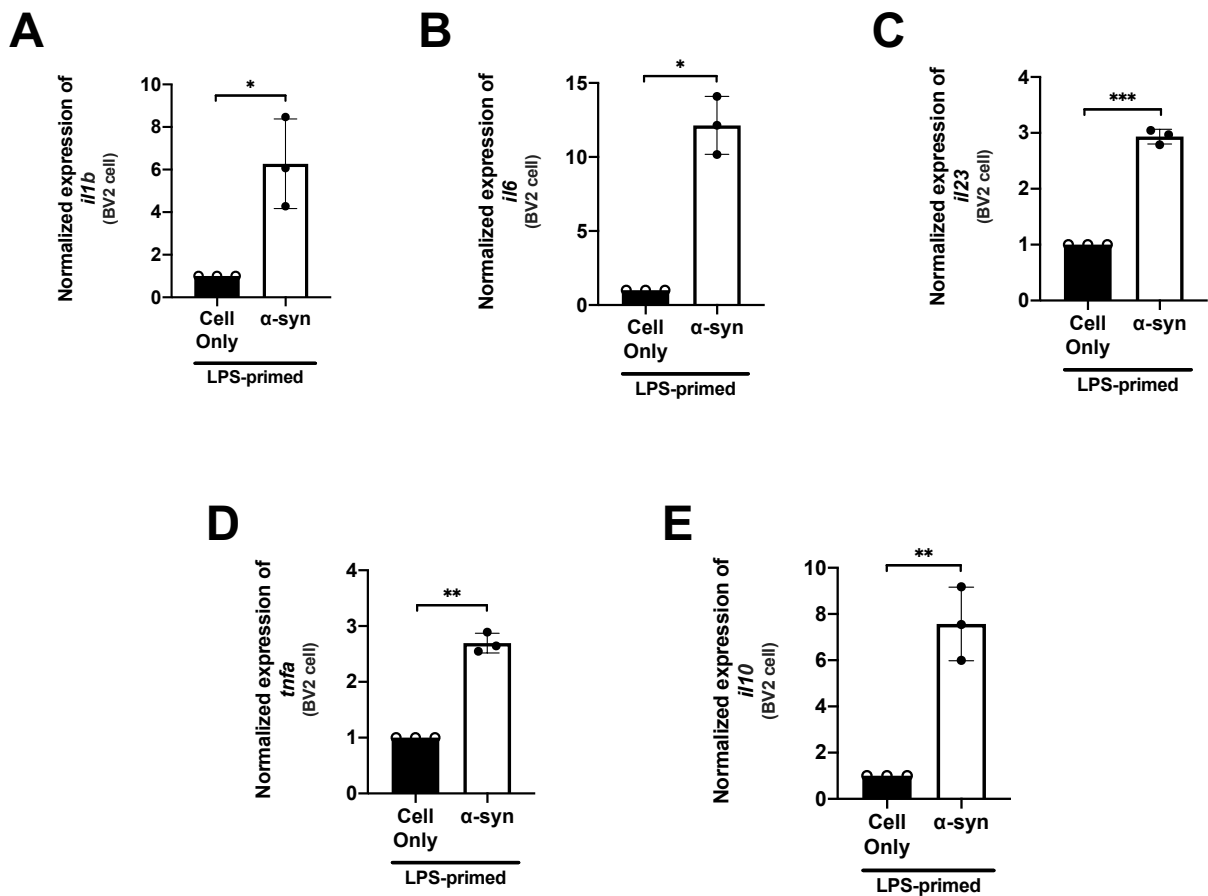

**Supp. Figure 1. Inflammatory gene expression of fibrillar  $\alpha$ -syn treated BV2.** BV2 cells were primed with LPS (100 ng/ml) for 3 h, washed 3 times with PBS and treated with fibrillar  $\alpha$ -syn (1  $\mu$ g/ml) for 3 h. Different cytokine gene expressions were tested by qRT-PCR. Relative gene expressions to  $\beta$ -actin were calculated and normalized to cell only. (A) *il1b*, (B) *il6*, (C) *il23*, (D) *tnfa*, (E) *il10*. Column graph data represents mean  $\pm$  SD from 3 individual experiments. Statistical significance was calculated by the Student's *t*-test (one tailed, paired) \* $P < 0.05$ , \*\* $P < 0.01$ , \*\*\* $P < 0.001$ .

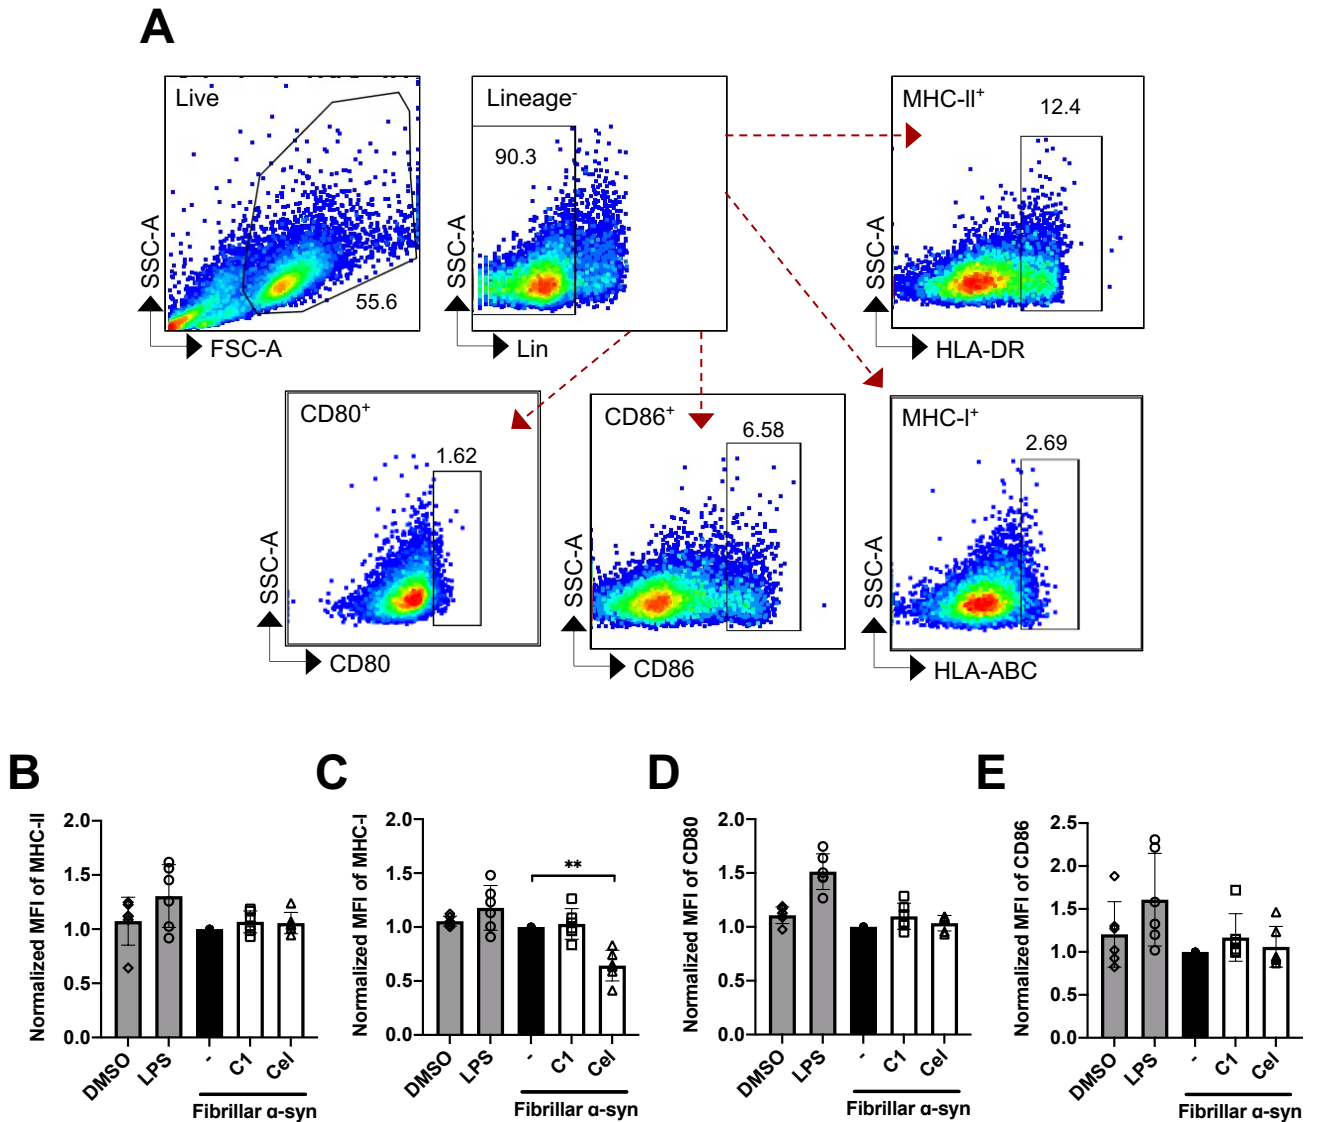

**Supp. Figure 2. Flow cytometric analysis of MHC and co-stimulatory molecule surface expression on fibrillar  $\alpha$ -syn-treated MoDCs.** MoDCs generated from PBMC were pre-treated with C1 (1  $\mu$ M) or Celestrol (0.25  $\mu$ M) for 1 h followed by treating with fibrillar  $\alpha$ -syn (1  $\mu$ g/ml) for 24 h. DMSO served as a drug treatment negative control. **(A)** Gating strategy to examine the surface expression of HLA-DR (MHC-II), HLA-ABC (MHC-I), CD80, CD86. **(B-E)** Column graphs of MFI result normalized to  $\alpha$ -syn only treatment. Column graph data represents mean  $\pm$  SD from 6 individual experiments. Statistical significance was calculated by one-way ANOVA and Tukey's multiple comparisons test,  $**P < 0.01$ .

**A**

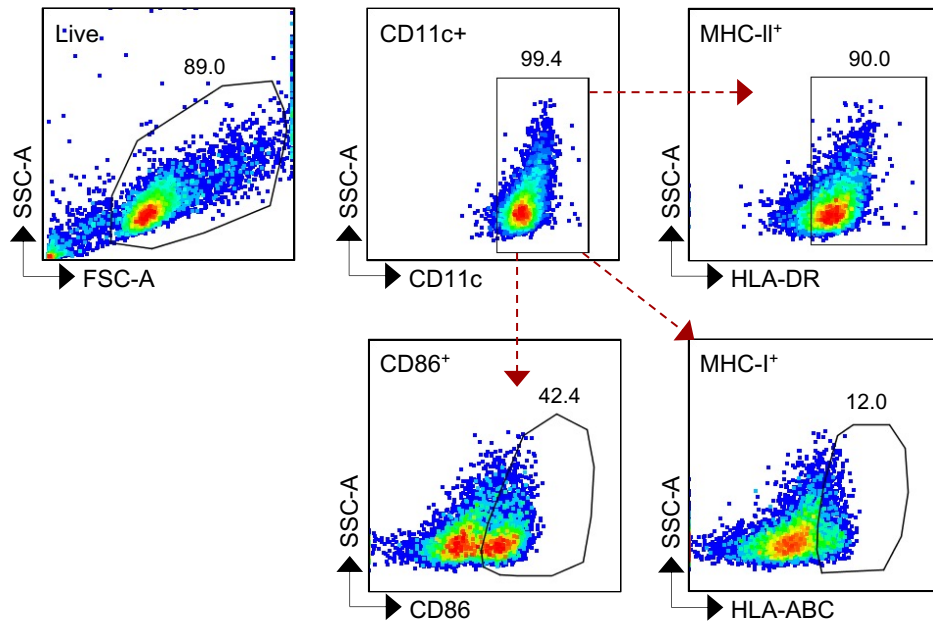

**B**

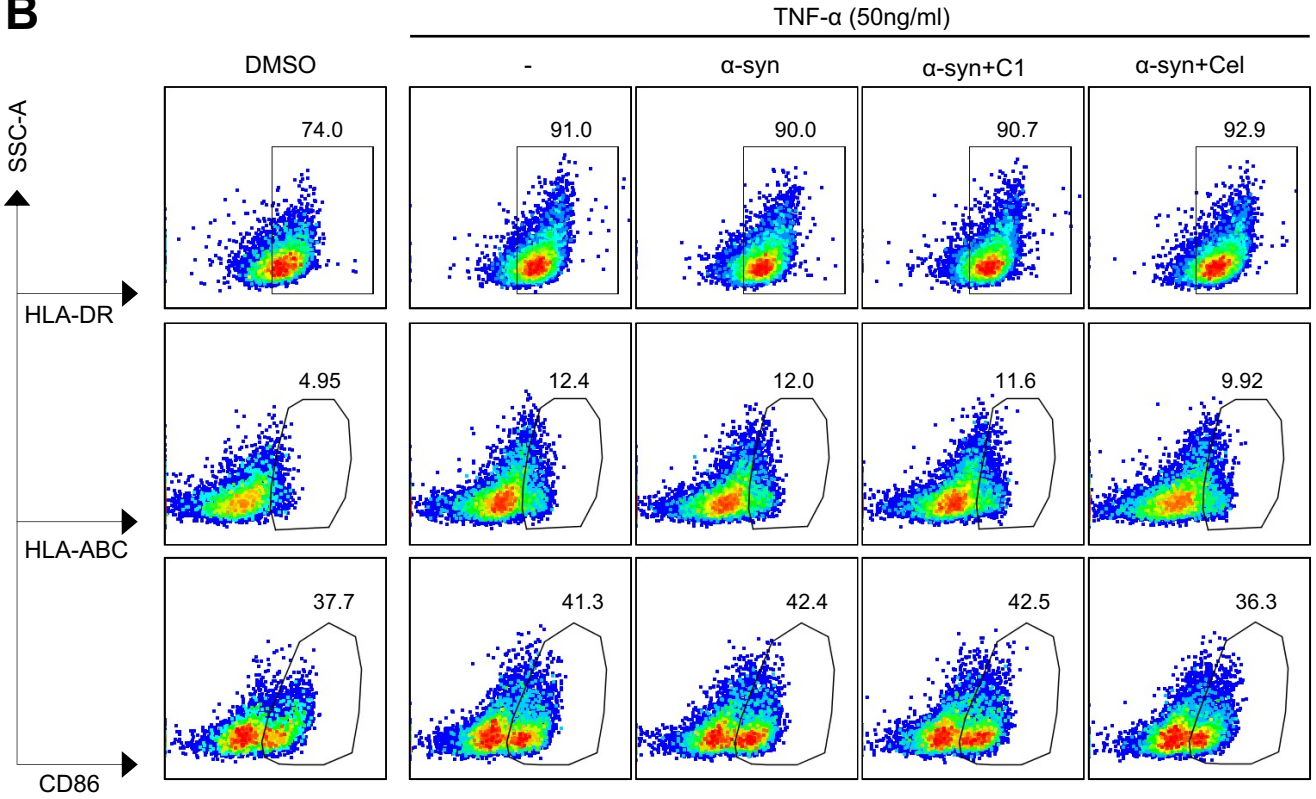

**C**

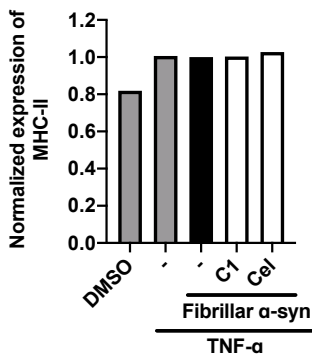

**D**

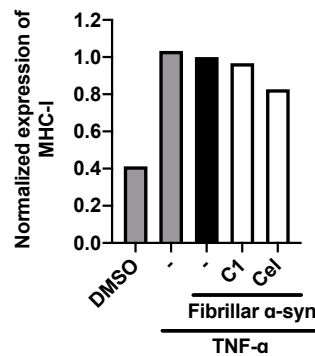

**E**

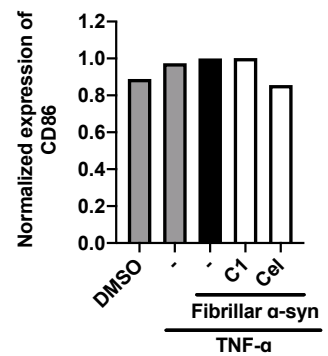

**Supp. Figure 3. Gating strategy and flow cytometric analysis of MHC and co-stimulatory molecule surface expression on fibrillar  $\alpha$ -syn-treated MoDCs matured with TNF- $\alpha$ .** MoDCs generated from PBMC were pre-treated with C1 (1  $\mu$ M) or Celastrol (0.25  $\mu$ M) for 1 h followed by matured with TNF- $\alpha$  (50 ng/ml) and treating with fibrillar  $\alpha$ -syn (1  $\mu$ g/ml) for 24 h. Surface expression of HLA-DR (MHC-II), HLA-ABC (MHC-I) and CD86 were assessed by flow cytometry. **(A)** Live cells were gated based on forward and side scatters, followed by gating CD11c<sup>+</sup> cells representing MoDCs. HLA-DR<sup>+</sup>, HLA-ABC<sup>+</sup> and CD86<sup>+</sup> were separately gated afterward. **(B)** Representative flow cytometry analysis plots of HLA-DR (MHC-II), HLA-ABC (MHC-I) and CD86 surface expression of drugs pre-treated, TNF- $\alpha$  matured and  $\alpha$ -syn treated MoDCs (numbers indicate percentages) of one experiment. **(C-E)** Column graphs of normalized results of surface expression of different proteins from one experiment.

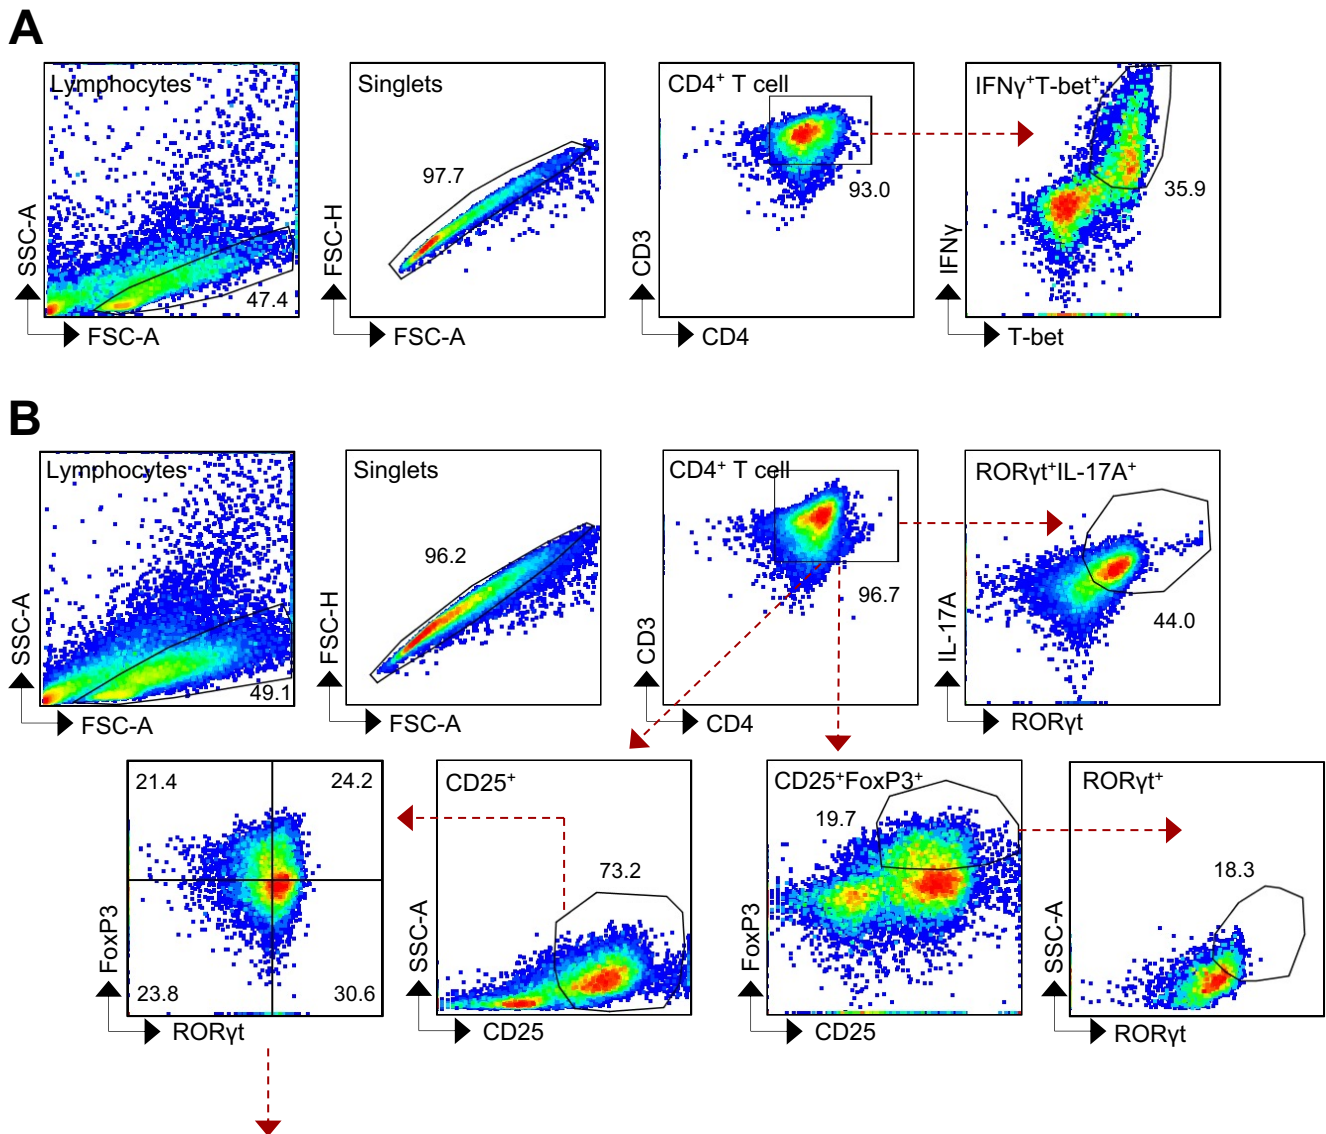

Subpopulations (%) in CD3<sup>+</sup>CD4<sup>+</sup>CD25<sup>+</sup> gated cells (mean  $\pm$  SD)

| ROR $\gamma$ t | FoxP3 | T cell only     | $\alpha$ -syn    | $\alpha$ -syn+C1 | $\alpha$ -syn+Cel |
|----------------|-------|-----------------|------------------|------------------|-------------------|
| +              | -     | 2.93 $\pm$ 4.92 | 31.14 $\pm$ 3.63 | 32.77 $\pm$ 4.65 | 7.95 $\pm$ 5.45   |
| -              | +     | 6.47 $\pm$ 0.64 | 17.88 $\pm$ 3.32 | 17.58 $\pm$ 1.85 | 30.47 $\pm$ 10.09 |
| +              | +     | 2.94 $\pm$ 3.62 | 21.87 $\pm$ 2.21 | 24.70 $\pm$ 3.18 | 15.61 $\pm$ 2.15  |

**Supp. Figure 4. Gating strategy for identifying Th1, Th17 and Treg subsets in  $\alpha$ -syn-specific CD4<sup>+</sup> T cell stimulated by  $\alpha$ -syn-pulsed MoDCs co-culture.**  $\alpha$ -syn-specific CD4<sup>+</sup> T cells were co-cultured with C1 or Celestrol pre-treated MoDCs pulsed with  $\alpha$ -syn to study the stimulated T cell subsets frequencies. Live cells were gated based on forward and side scatters, followed by singular cells. CD4<sup>+</sup> T cells were identified by gating on CD3<sup>+</sup> and CD4<sup>+</sup> cells and were further gated on **(A)** T-bet<sup>+</sup>IFN $\gamma$ <sup>+</sup> (Th1) cells; **(B)** ROR $\gamma$ t<sup>+</sup>IL-17A<sup>+</sup> (Th17) cells or CD25<sup>+</sup>FoxP3<sup>+</sup> (Treg) cells. ROR $\gamma$ t<sup>+</sup> cells were also gated from CD25<sup>+</sup>FoxP3<sup>+</sup> (Treg) cells. Alternatively, CD25<sup>+</sup> cells were gated from CD3<sup>+</sup>CD4<sup>+</sup> cells and analyzed for the frequencies of ROR $\gamma$ t<sup>+</sup>FoxP3<sup>-</sup>, ROR $\gamma$ t<sup>-</sup>FoxP3<sup>+</sup>, and FoxP3<sup>+</sup>ROR $\gamma$ t<sup>+</sup> subpopulations. The percentage of each subsets from four individual experiment is listed in the table.

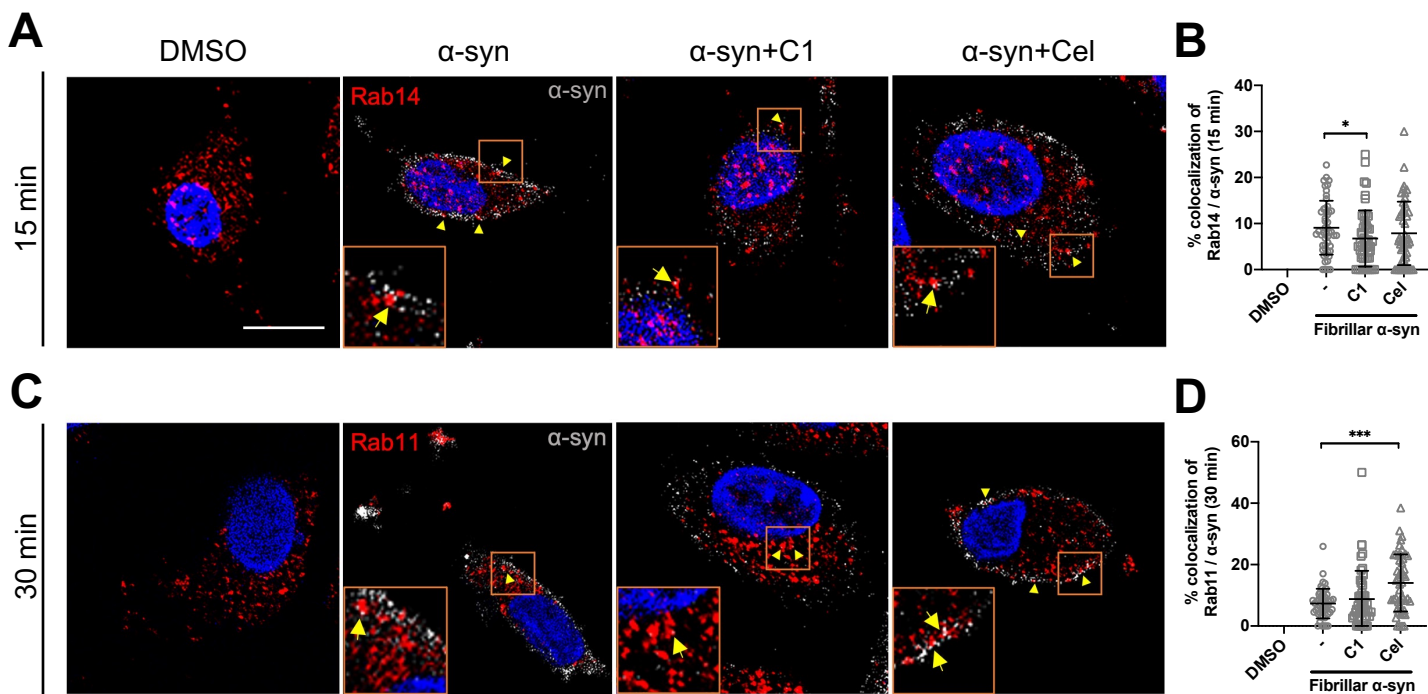

**Supp. Figure 5. Colocalization of Rab14 and Rab11 with fibrillar  $\alpha$ -syn in MoDCs.** MoDCs were pre-treated with C1 (1  $\mu$ M) or Celastrol (0.25  $\mu$ M) for 1 h followed by treating with fibrillar  $\alpha$ -syn (1  $\mu$ g/ml) for 15 min and 30 min. Rab14, Rab11 (red) and  $\alpha$ -syn (white) were immunostained for the corresponding timepoint with DAPI (blue) and observed under confocal microscope. Representative images showing the colocalization of Rab proteins with  $\alpha$ -syn (yellow arrows) under different treatments and dot plots showing the percentage of colocalization. **(A-B)** Colocalization of Rab14 and  $\alpha$ -syn at 15 min post  $\alpha$ -syn treatment and **(C-D)** colocalization of Rab11 and  $\alpha$ -syn at 30 min post  $\alpha$ -syn treatment. Images are representative of 50 individual cells. Scale bar: 10  $\mu$ m. Each dot in the dot plots represents data of a cell and the mean  $\pm$  SD of 50 individual cells is indicated. Statistical significance was calculated by one-way ANOVA and Tukey's multiple comparisons test, \* $P < 0.05$  \*\*\* $P < 0.001$ .

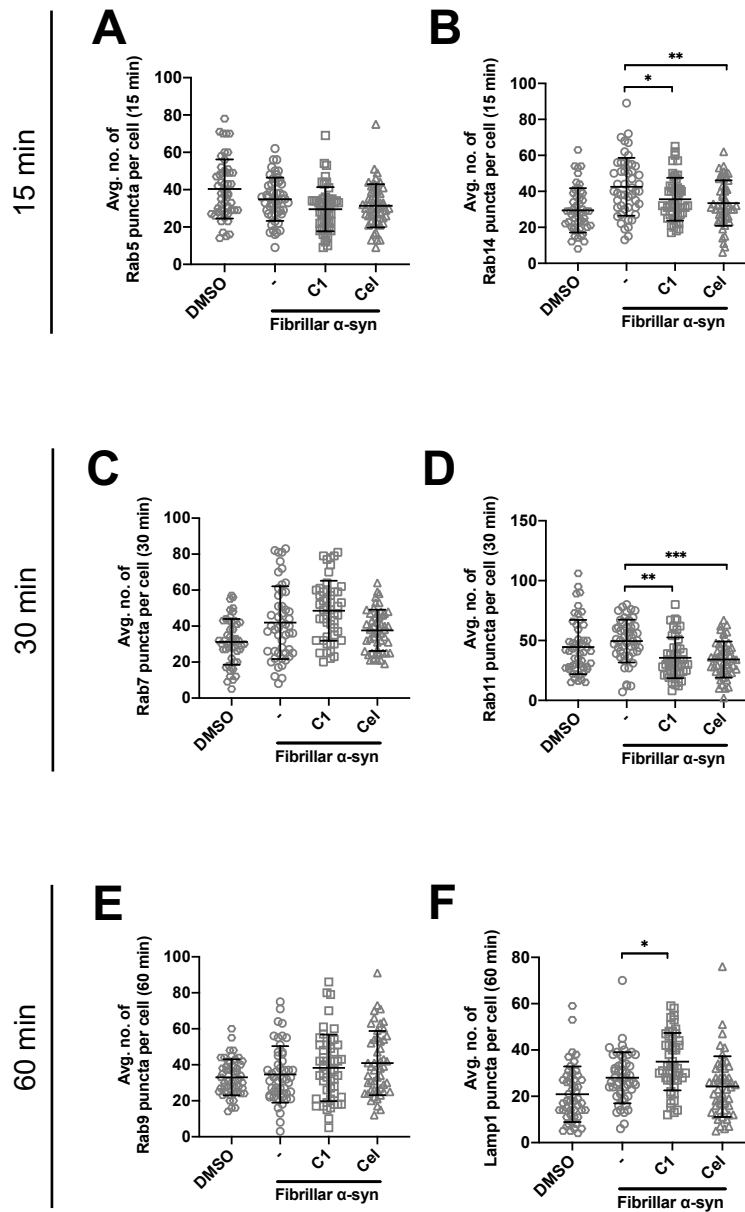

**Supp. Figure 6. Analysis of Rab protein and Lamp1 positive puncta per cell in MoDCs following  $\alpha$ -syn treatment.** MoDCs were pre-treated with C1 (1  $\mu$ M) or Celastrol (0.25  $\mu$ M) for 1 h followed by treatment with fibrillar  $\alpha$ -syn (1  $\mu$ g/ml) for 15 min, 30 min and 60 min. Rab proteins and lysosome marker Lamp1 were immunostained for the corresponding timepoint with DAPI and observed under the confocal microscope. The numbers of Rab protein puncta in MoDCs with different treatments were counted at corresponding timepoint and shown as dot plots. The average number of (A) Rab5 and (B) Rab14 puncta at 15 min, or (C) Rab7 and (D) Rab11 at 30 min post  $\alpha$ -syn treatment, and (E) Rab9 and (F) Lamp1 at 60 min post  $\alpha$ -syn stimulation are shown. Each dot in the dot plots represents data of a cell and the mean  $\pm$  SD of 50 individual cells is indicated. Statistical significance was calculated by one-way ANOVA and Tukey's multiple comparisons test, \* $P$  < 0.05, \*\* $P$  < 0.01, \*\*\* $P$  < 0.001.

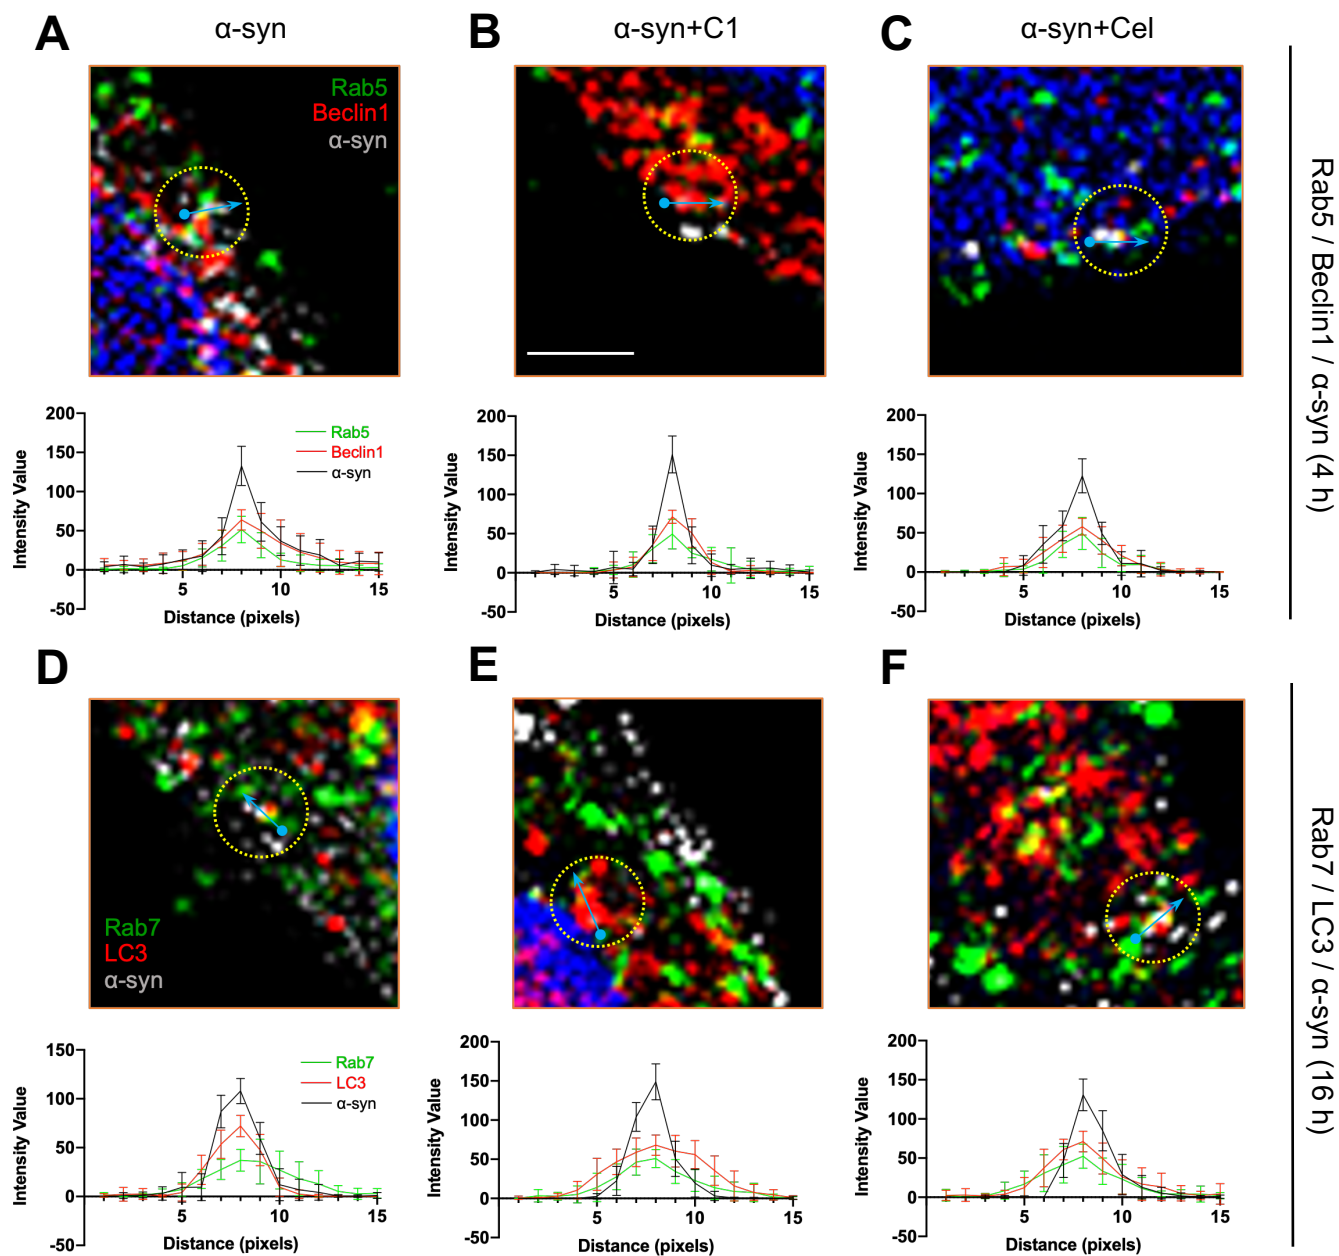

**Supp. Figure 7. Colocalization profiles of Rab or autophagic proteins colocalization with  $\alpha$ -syn in MoDCs.** MoDCs with or without C1 (1  $\mu$ M) and Celastrol (0.25  $\mu$ M) pre-treatment were treated with  $\alpha$ -syn (1  $\mu$ g/ml). Images from Figure 5 insets are reproduced here, and the fluorescence signal profiles were analyzed and plotted in a histogram to indicate colocalizations across the distance indicated by the blue arrow equivalent to left to right in the histogram. (A-C) Interaction between Rab5 (green line), Beclin1 (red line) and  $\alpha$ -syn (black line) are shown, with or without C1 or Celastrol pre-treatment. (D-F) Interaction between Rab7 (green line), LC3 (red line) and  $\alpha$ -syn (black line) with or without C1 or Celastrol pre-treatment are shown. Images are representative of 50 individual cells. Scale bar: 2  $\mu$ m. Data represents mean  $\pm$  SEM of 10 puncta from different individual cells.



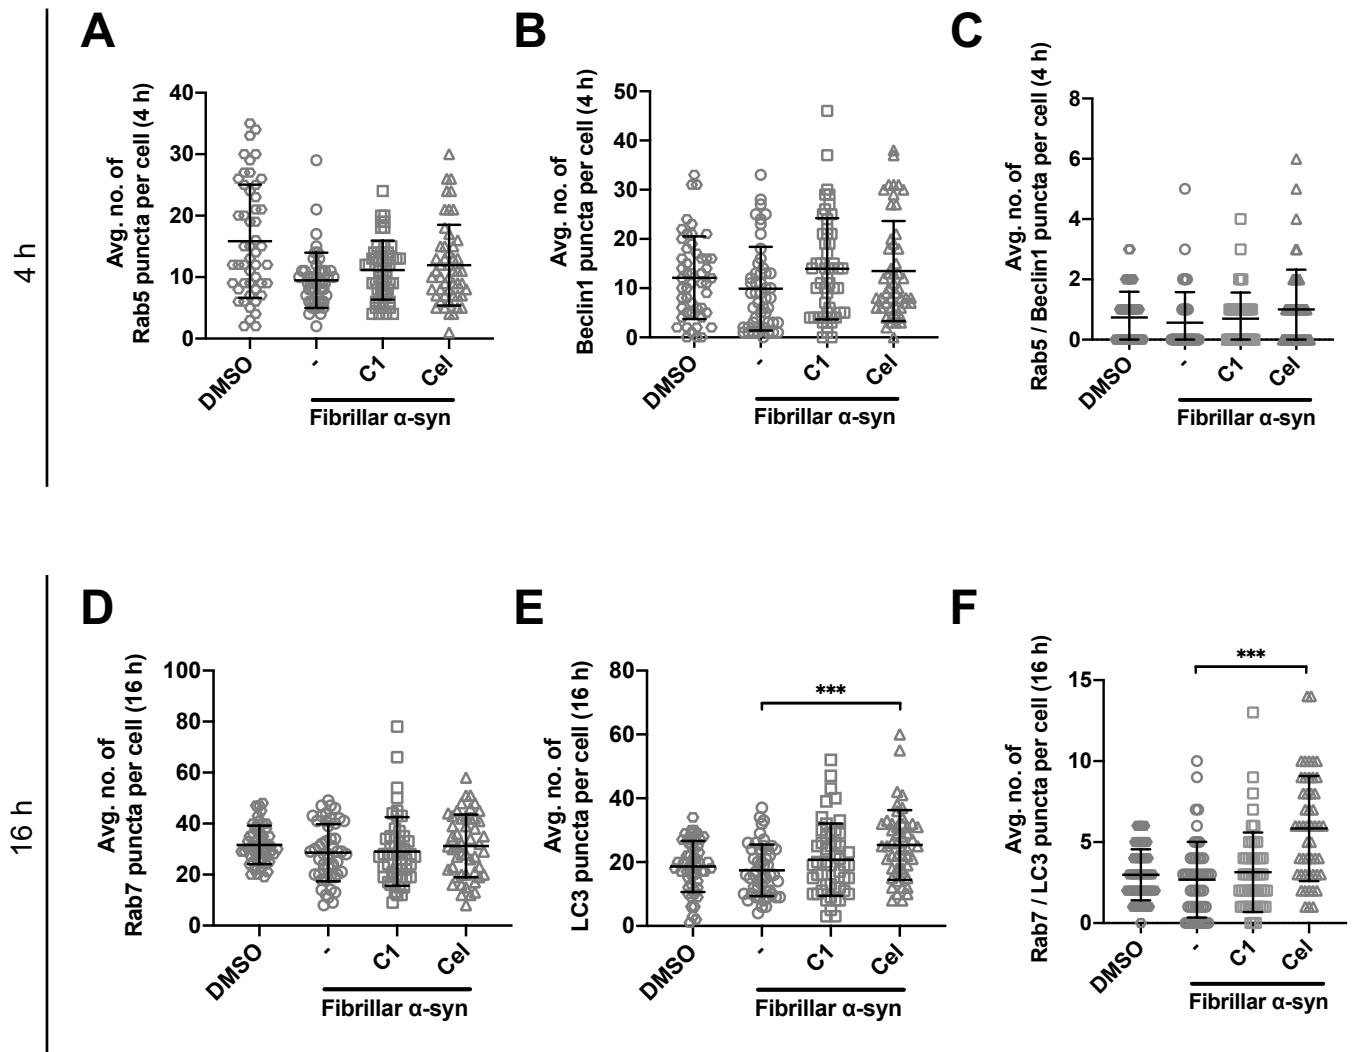

**Supp. Figure 8. Analysis of autophagosomes in conjunction to Rab5 and Rab7 puncta in MoDCs after fibrillar  $\alpha$ -syn treatment.** MoDCs were pre-treated with C1 (1  $\mu$ M) or Celastrol (0.25  $\mu$ M) for 1 h followed by fibrillar  $\alpha$ -syn (1  $\mu$ g/ml) treatment for 4 h or 16 h, immunostained and observed under the confocal microscope. The number of Rab5, Rab7, Beclin1 and LC3 positive puncta, and colocalization puncta of the Rab5/Beclin1 and Rab7/LC3 (without  $\alpha$ -syn) were counted respectively at each timepoint and shown as dot plots. (A) Rab5, (B) Beclin1, (C) Rab5/Beclin1, (D) Rab7, (E) LC3 and (F) Rab7/LC3 puncta are indicated. Each dot in the dot plots represents data of a cell and the mean  $\pm$  SD of 50 individual cells is indicated. Statistical significance was calculated by one-way ANOVA and Tukey's multiple comparisons test, \*\*\* $P < 0.001$ .

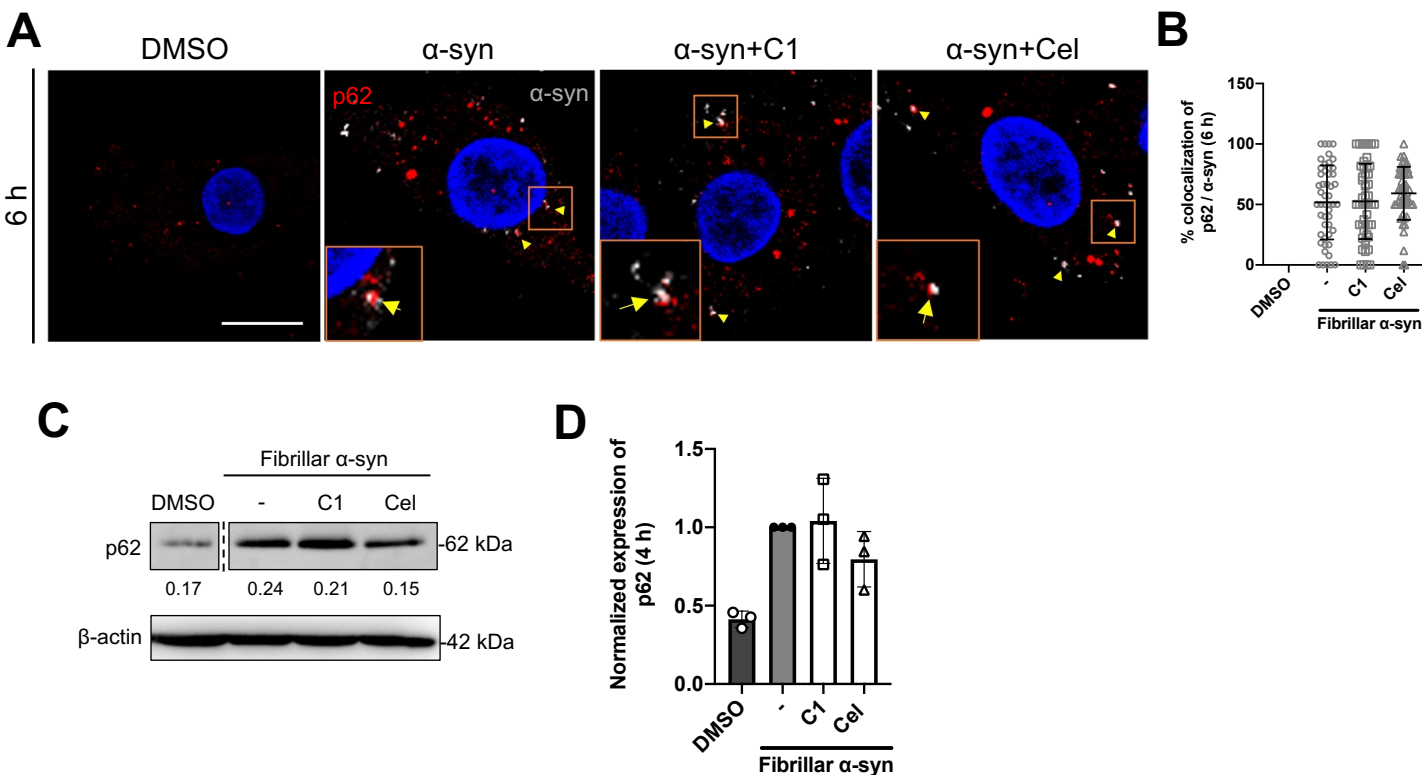

**Supp. Figure 9. Expression of p62 and its colocalization with fibrillar  $\alpha$ -syn in MoDCs.** MoDCs were pre-treated with C1 (1  $\mu$ M) or Celastrol (0.25  $\mu$ M) for 1 h followed by treating with fibrillar  $\alpha$ -syn (1  $\mu$ g/ml) for 4 h or 6 h. p62 (red) and  $\alpha$ -syn (white) were immunostained with DAPI (blue) and observed under the confocal microscope. Representative images showing the colocalization of p62 with  $\alpha$ -syn (yellow arrows) under different treatments and the dot plot showing the percentage of colocalization of each cell. **(A-B)** Colocalization of p62 and  $\alpha$ -syn at 6 h post  $\alpha$ -syn treatment. Images are representative of 50 individual cells. Scale bar: 10  $\mu$ m. Each dot in the dot plots represents data of a cell and the mean  $\pm$  SD of 50 individual cells is indicated. **(C)** The expression of p62 in drug pre-treated MoDCs was determined by Western Blot at 4 h post  $\alpha$ -syn treatment. Relative expressions of p62 to  $\beta$ -actin were quantified by ImageJ and indicated on the blots, which were further normalized to  $\alpha$ -syn only treatment shown in **(D)**. Column graph data represents mean  $\pm$  SD from 3 individual experiments. Statistical significance was calculated by one-way ANOVA and Tukey's multiple comparisons test.

C1

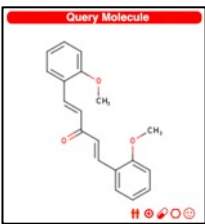

Celastrol

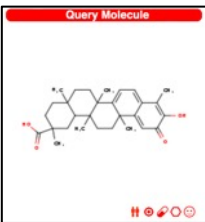

### SwissTargetPrediction

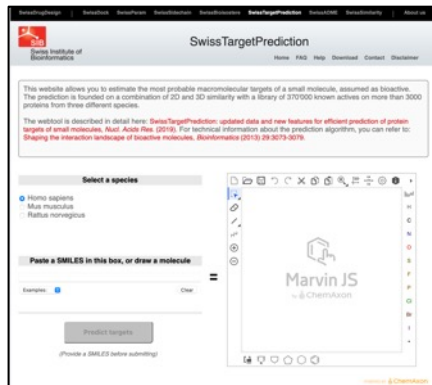

### Removal of common targets

| C1 target                                             | Celastrol target                                         |
|-------------------------------------------------------|----------------------------------------------------------|
| Multidrug resistance-associated protein 1             | Angiotensin-converting enzyme (by homology)              |
| ATP-binding cassette sub-family G member 2            | Low molecular weight phosphotyrosine protein phosphatase |
| Adenosine kinase                                      | ADAM17                                                   |
| Alpha-1b adrenergic receptor                          | Type-1 angiotensin II receptor                           |
| Angiotensin II receptor                               | Aldose reductase (by homology)                           |
| Serine/threonine-protein kinase AKT                   | Aldo-keto-reductase family 1 member C3                   |
| <b>Arachidonate 5-lipoxygenase</b>                    | <b>Aldehyde dehydrogenase</b>                            |
| Serine/threonine-protein kinase Aurora-A              | <b>Arachidonate 5-lipoxygenase</b>                       |
| Beta-secretase 1                                      | 5-lipoxygenase activating protein                        |
| Bromodomain adjacent to zinc finger domain protein 2A | Androgen Receptor                                        |
| Bromodomain adjacent to zinc finger domain protein 2B | Potassium-transporting ATPase alpha chain 2              |
| Bradykinin B2 receptor                                | Bone morphogenetic protein 1                             |
| Bromodomain-containing protein 2                      | Calcitonin gene-related peptide type 1 receptor          |
| Bromodomain-containing protein 3                      | Cholecystokinin B receptor (by homology)                 |
| Bromodomain-containing protein 4                      | CD81 antigen                                             |
| Carbonic anhydrase I                                  | Dual specificity phosphatase Cdc25B                      |
| Carbonic anhydrase XII                                | Carboxylesterase 2                                       |

### Grouping and identify potential targets

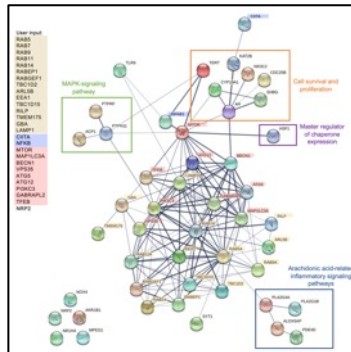

### STRING database analysis

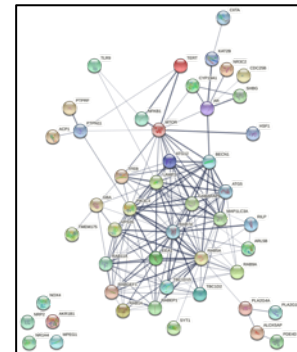

Literature search

### List of potential targets

| Celastrol target                       | Common name | Probability* |
|----------------------------------------|-------------|--------------|
| <b>Androgen Receptor</b>               | AR          | 0.10063443   |
| <b>Cytosolic phospholipase A2</b>      | PLA2G4A     | 0.10063443   |
| <b>Protein-tyrosine phosphatase 2C</b> | PTPN11      | 0.64536304   |

  

| C1 target                  | Common name | Probability* |
|----------------------------|-------------|--------------|
| <b>Cathepsin (B and K)</b> | CTSB        | 0.11150187   |
| <b>Cathepsin L</b>         | CTSL        | 0.11150187   |

**Supp. Figure 10. Flow chart of the functional prediction of putative protein targets of C1 or Celastrol.** The structure of C1 or Celastrol was inputted into the SwissTargetPrediction tool which generated a list of putative protein targets that Celastrol can possibly interact with. Common protein targets of C1 and Celastrol were removed. Then, the respective list of C1 and Celastrol was inputted into the STRING database separately, together with the known proteins associated with our findings, such as Rab and autophagy-related proteins, and their regulators or effectors, to generate an interactive network. The proteins are manually grouped by their functional similarities. Literature search on each putative protein targets were carried out to identify any possible relationship of them with antigen processing or presentation that could explain the differential effect of C1 and Celastrol in modulating MoDC-mediated T cell responses in PD.

**User input:**

- RAB5
- RAB7
- RAB9
- RAB11
- RAB14
- RABEP1
- RABGEF1
- TBC1D2
- ARL5B
- EEA1
- TBC1D15
- RILP
- TMEM175
- GBA
- LAMP1
- CIITA
- NFKB
- MTOR
- MAP1LC3A
- BECN1
- VPS35
- ATG5
- ATG12
- PI3KC3
- GABARAPL2
- TFEB
- NRP2

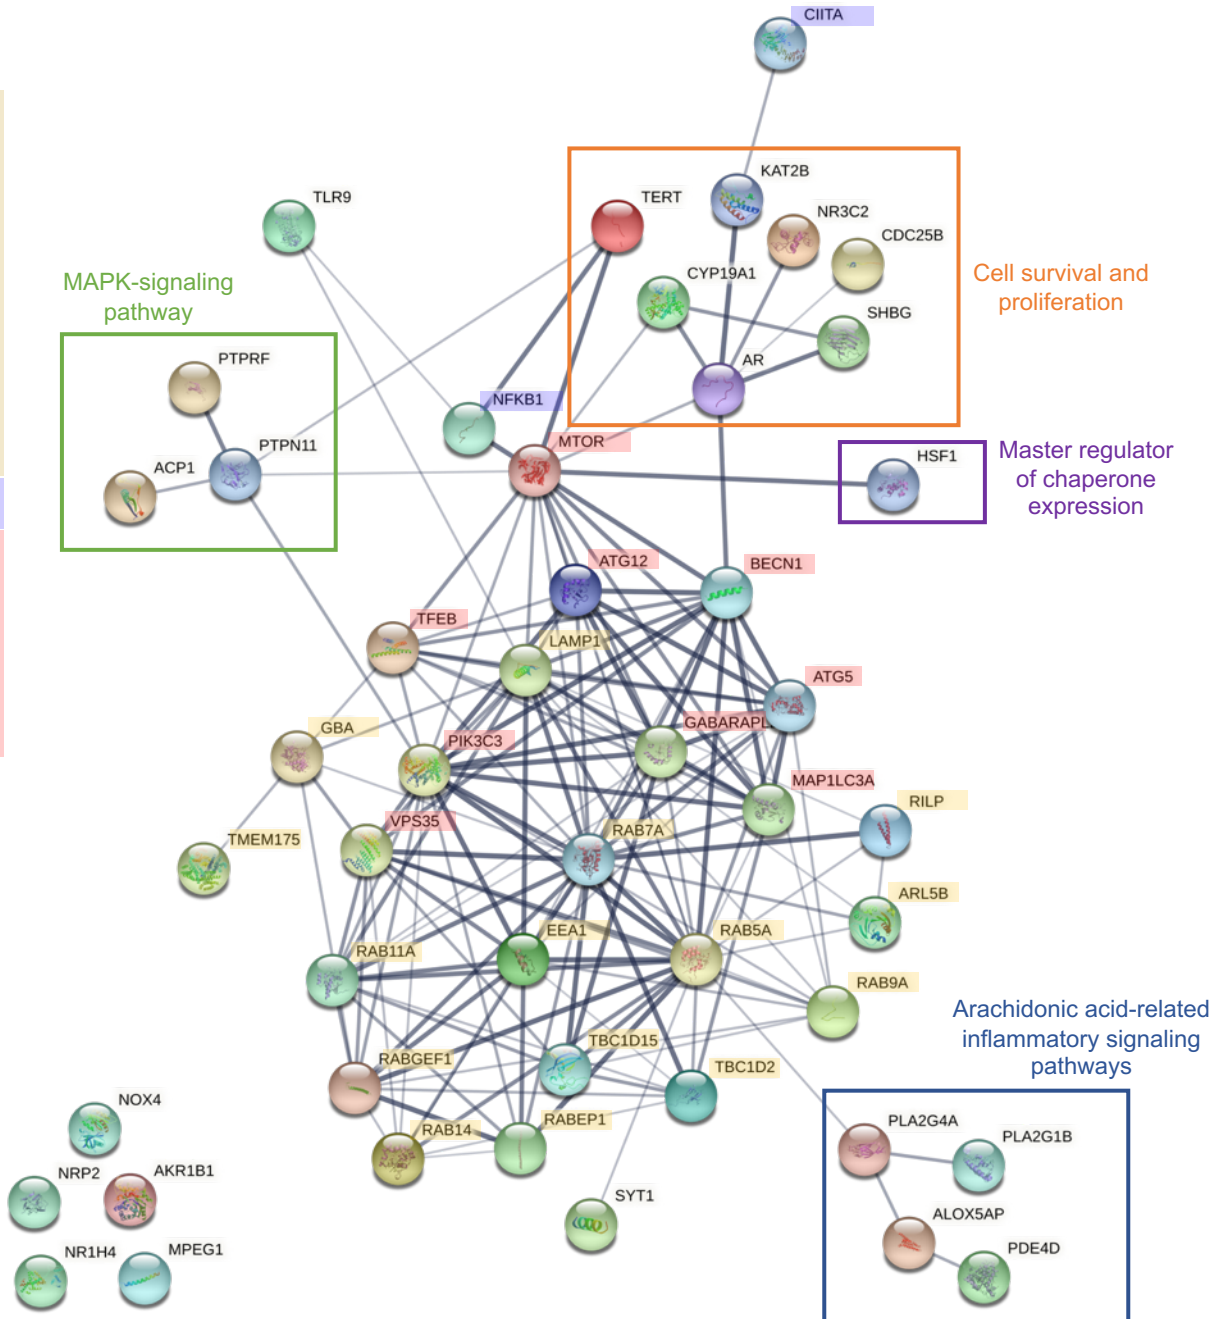

**Supp. Figure 11. Functional association analysis of endo-lysosomal or autophagic proteins with putative protein targets of Celastrol.** Functional association protein networks using the STRING database were established from the putative protein targets that could interact with Celastrol (SwissTargetPrediction). The lines represent protein-protein associations, and the thickness of the lines represents the strength of data supporting such association. The central cluster contains proteins that are related to endo-lysosomal (names with yellow-brown hue), autophagic pathways (red), and antigen presentation pathway (blue) while other clusters are putative protein targets of Celastrol and are grouped according to their functional similarities.

Supp. Figure 12.

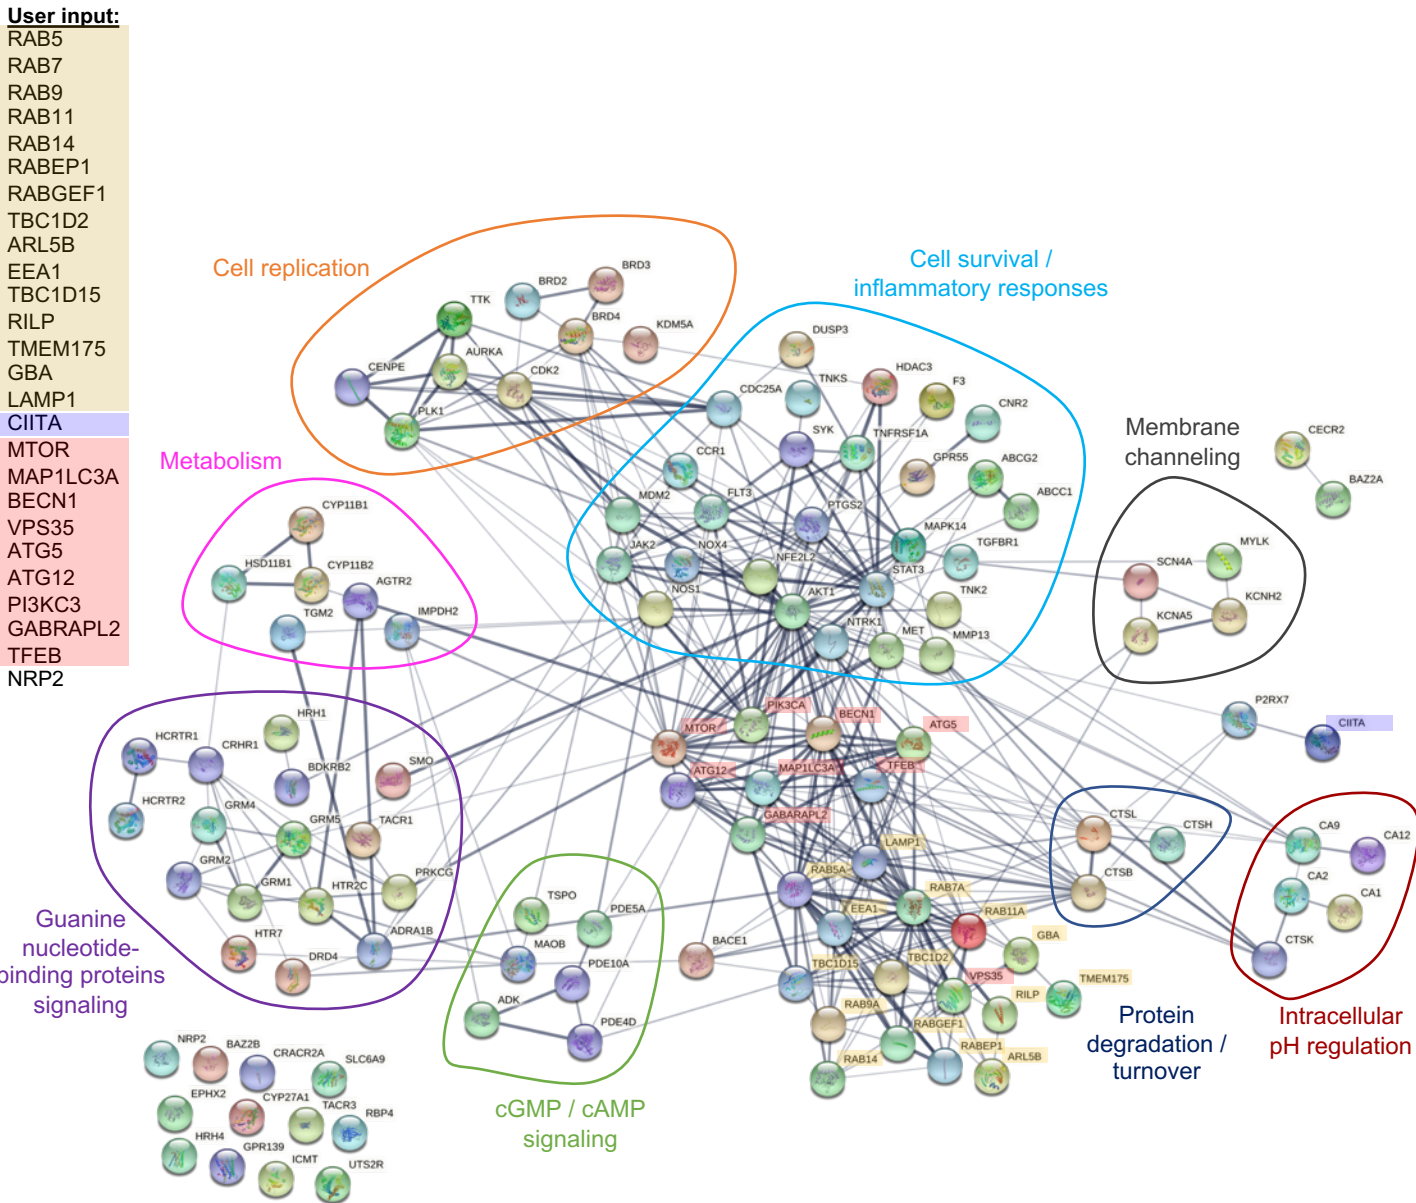

**Supp. Figure 12. Functional association analysis of endo-lysosomal or autophagic proteins with putative protein targets of C1.** Functional association protein networks using the STRING database were established from the putative protein targets that could interact with C1 (SwissTargetPrediction). The lines represent protein-protein associations, and the thickness of the lines represents the strength of data supporting such association. The central cluster contains proteins that are related to endo-lysosomal (names with yellow-brown hue), autophagic pathways (red), and antigen presentation pathway (blue) while other clusters are putative protein targets of C1 and are grouped according to their functional similarities.

**Table S1. Putative protein targets of Celastrol.**

| SwissTargetPrediction                                    |             |             |
|----------------------------------------------------------|-------------|-------------|
| Target                                                   | Common name | Probability |
| Toll-like receptor (TLR7/TLR9)                           | TLR9        | 1           |
| Protein-tyrosine phosphatase 2C                          | PTPN11      | 0.645363044 |
| Aldose reductase (by homology)                           | AKR1B1      | 0.402269489 |
| Telomerase reverse transcriptase                         | TERT        | 0.1760545   |
| Heat shock factor protein 1                              | HSF1        | 0.1760545   |
| Cytochrome P450 19A1                                     | CYP19A1     | 0.100634432 |
| Phospholipase A2 group 1B                                | PLA2G1B     | 0.100634432 |
| Dual specificity phosphatase Cdc25B                      | CDC25B      | 0.100634432 |
| Receptor-type tyrosine-protein phosphatase F (LAR)       | PTPRF       | 0.100634432 |
| Low molecular weight phosphotyrosine protein phosphatase | ACP1        | 0.100634432 |
| Phosphodiesterase 4D                                     | PDE4D       | 0.100634432 |
| Testis-specific androgen-binding protein                 | SHBG        | 0.100634432 |
| Macrophage-expressed gene 1 protein                      | MPEG1       | 0.100634432 |
| Histone acetyltransferase PCAF                           | KAT2B       | 0.100634432 |
| 5-lipoxygenase activating protein                        | ALOX5AP     | 0.100634432 |
| Mineralocorticoid receptor                               | NR3C2       | 0.100634432 |
| Cytosolic phospholipase A2                               | PLA2G4A     | 0.100634432 |
| Bile acid receptor FXR                                   | NR1H4       | 0.100634432 |
| Androgen Receptor                                        | AR          | 0.100634432 |

Only those targets predicted with possibility > 0 were shown.

**Table S2. Putative protein targets of C1.**

| SwissTargetPrediction                                 |  | Common name      | Probability |
|-------------------------------------------------------|--|------------------|-------------|
| Target                                                |  |                  |             |
| Multidrug resistance-associated protein 1             |  | ABCC1            | 0.111501865 |
| ATP-binding cassette sub-family G member 2            |  | ABCG2            | 0.111501865 |
| Adenosine kinase                                      |  | ADK              | 0.111501865 |
| Alpha-1b adrenergic receptor                          |  | ADRA1B           | 0.111501865 |
| Angiotensin II receptor                               |  | AGTR2            | 0.111501865 |
| Serine/threonine-protein kinase AKT                   |  | AKT1             | 0.111501865 |
| Serine/threonine-protein kinase Aurora-A              |  | AURKA            | 0.111501865 |
| Beta-secretase 1                                      |  | BACE1            | 0.111501865 |
| Bromodomain adjacent to zinc finger domain protein 2A |  | BAZ2A            | 0.111501865 |
| Bromodomain adjacent to zinc finger domain protein 2B |  | BAZ2B            | 0.111501865 |
| Bradykinin B2 receptor                                |  | BDKRB2           | 0.111501865 |
| Bromodomain-containing protein 2                      |  | BRD2             | 0.111501865 |
| Bromodomain-containing protein 3                      |  | BRD3             | 0.111501865 |
| Bromodomain-containing protein 4                      |  | BRD4             | 0.111501865 |
| Carbonic anhydrase I                                  |  | CA1              | 0.111501865 |
| Carbonic anhydrase XII                                |  | CA12             | 0.111501865 |
| Carbonic anhydrase II                                 |  | CA2              | 0.111501865 |
| Carbonic anhydrase IX                                 |  | CA9              | 0.111501865 |
| C-C chemokine receptor type 1                         |  | CCR1             | 0.111501865 |
| Dual specificity phosphatase Cdc25A                   |  | CD25A            | 0.111501865 |
| Cyclin-dependent kinase 2                             |  | CDK2             | 0.111501865 |
| Cyclin-dependent kinase 2/cyclin A                    |  | CDK2 CCNA1 CCNA2 | 0.111501865 |
| CDK9/cyclin T1                                        |  | CDK9 CCNT1       | 0.111501865 |
| Cat eye syndrome critical region protein 2            |  | CECR2            | 0.111501865 |
| Centromere-associated protein E                       |  | CENPE            | 0.111501865 |
| Cannabinoid receptor 2                                |  | CNR2             | 0.111501865 |
| EF-hand calcium-binding domain-containing protein 4B  |  | CRACR2A          | 0.111501865 |
| Corticotropin releasing factor receptor 1             |  | CRHR1            | 0.111501865 |
| Cathepsin (B and K)                                   |  | CTSB             | 0.111501865 |
| Cathepsin K                                           |  | CTSK             | 0.111501865 |
| Cathepsin L                                           |  | CTSL             | 0.111501865 |
| Cytochrome P450 11B1                                  |  | CYP11B1          | 0.111501865 |
| Cytochrome P450 11B2                                  |  | CYP11B2          | 0.111501865 |
| Sterol 26-hydroxylase, mitochondrial                  |  | CYP27A1          | 0.111501865 |
| Dopamine D4 receptor                                  |  | DRD4             | 0.111501865 |
| Dual specificity protein phosphatase 3                |  | DUSP3            | 0.111501865 |
| Epoxide hydratase                                     |  | EPHX2            | 0.111501865 |
| Coagulation factor VII/tissue factor                  |  | F3               | 0.111501865 |
| Tyrosine-protein kinase receptor FLT3                 |  | FLT3             | 0.111501865 |
| Protein farnesyltransferase                           |  | FNTA FNTB        | 0.111501865 |
| Probable G-protein coupled receptor 139               |  | GPR139           | 0.111501865 |
| G-protein coupled receptor 55                         |  | GPR55            | 0.111501865 |
| Metabotropic glutamate receptor 1                     |  | GRM1             | 0.111501865 |
| Metabotropic glutamate receptor 2                     |  | GRM2             | 0.111501865 |
| Metabotropic glutamate receptor 4                     |  | GRM4             | 0.111501865 |
| Metabotropic glutamate receptor 5                     |  | GRM5             | 0.111501865 |
| Orexin receptor 1                                     |  | HCRTR1           | 0.111501865 |

| SwissTargetPrediction                              |  | Common name                          | Probability |
|----------------------------------------------------|--|--------------------------------------|-------------|
| Target                                             |  |                                      |             |
| Orexin receptor 2                                  |  | HCRTR2                               | 0.111501865 |
| Histone deacetylase 3                              |  | HDAC3                                | 0.111501865 |
| Histamine H1 receptor                              |  | HRH1                                 | 0.111501865 |
| Histamine H4 receptor                              |  | HRH4                                 | 0.111501865 |
| 11-beta-hydroxysteroid dehydrogenase 1             |  | HSD11B1                              | 0.111501865 |
| Serotonin 2c (5-HT2c) receptor                     |  | HTR2C                                | 0.111501865 |
| Serotonin 7 (5-HT7) receptor                       |  | HTR7                                 | 0.111501865 |
| Isoprenylcysteine carboxyl methyltransferase       |  | ICMT                                 | 0.111501865 |
| Inosine-5'-monophosphate dehydrogenase 2           |  | IMPDH2                               | 0.111501865 |
| Tyrosine-protein kinase JAK2                       |  | JAK2                                 | 0.111501865 |
| Voltage-gated potassium channel subunit Kv1.5      |  | KCNA5                                | 0.111501865 |
| HERG                                               |  | KCNH2                                | 0.111501865 |
| Lysine-specific demethylase 5A                     |  | KDM5A                                | 0.111501865 |
| Monoamine oxidase B                                |  | MAOB                                 | 0.111501865 |
| MAP kinase p38 alpha                               |  | MAPK14                               | 0.111501865 |
| p53-binding protein Mdm-2                          |  | MDM2                                 | 0.111501865 |
| Hepatocyte growth factor receptor                  |  | MET                                  | 0.111501865 |
| Matrix metalloproteinase 13                        |  | MMP13                                | 0.111501865 |
| Serine/threonine-protein kinase mTOR (by homology) |  | MTOR                                 | 0.111501865 |
| Myosin light chain kinase, smooth muscle           |  | MYLK                                 | 0.111501865 |
| Nuclear factor erythroid 2-related factor 2        |  | NFE2L2                               | 0.111501865 |
| Nitric-oxide synthase, brain                       |  | NOS1                                 | 0.111501865 |
| Nerve growth factor receptor Trk-A                 |  | NTRK1                                | 0.111501865 |
| P2X purinoceptor 7                                 |  | P2RX7                                | 0.111501865 |
| Phosphodiesterase 10A                              |  | PDE10A                               | 0.111501865 |
| Phosphodiesterase 4D                               |  | PDE4D                                | 0.111501865 |
| Phosphodiesterase 5A                               |  | PDE5A                                | 0.111501865 |
| PI3-kinase p110-alpha subunit                      |  | PIK3CA                               | 0.111501865 |
| Serine/threonine-protein kinase PLK1               |  | PLK1                                 | 0.111501865 |
| Protein kinase C gamma (by homology)               |  | PRKCG                                | 0.111501865 |
| Gamma-secretase                                    |  | PSEN2 PSENEN NCSTN APH1A PSEN1 APH1B | 0.111501865 |
| Cyclooxygenase-2                                   |  | PTGS2                                | 0.111501865 |
| Plasma retinol-binding protein                     |  | RBP4                                 | 0.111501865 |
| Sodium channel protein type IV alpha subunit       |  | SCN4A                                | 0.111501865 |
| Glycine transporter 1                              |  | SLC6A9                               | 0.111501865 |
| Smoothed homolog                                   |  | SMO                                  | 0.111501865 |
| Signal transducer and activator of transcription 3 |  | STAT3                                | 0.111501865 |
| Tyrosine-protein kinase SYK                        |  | SYK                                  | 0.111501865 |
| Neurokinin 1 receptor                              |  | TACR1                                | 0.111501865 |
| Neurokinin 3 receptor                              |  | TACR3                                | 0.111501865 |
| TGF-beta receptor type I                           |  | TGFBRI                               | 0.111501865 |
| Protein-glutamine gamma-glutamyltransferase        |  | TGM2                                 | 0.111501865 |
| Tumor necrosis factor receptor R1                  |  | TNFRSF1A                             | 0.111501865 |
| Tyrosine kinase non-receptor protein 2             |  | TNK2                                 | 0.111501865 |
| Tankyrase-1                                        |  | TNKS                                 | 0.111501865 |
| Translocator protein (by homology)                 |  | TSPO                                 | 0.111501865 |
| Dual specificity protein kinase TTK                |  | TTK                                  | 0.111501865 |
| Urotensin II receptor                              |  | UTSR2                                | 0.111501865 |

Only those targets predicted with possibility > 0 were shown.
