# Supplementary material for: Celastrol Downmodulates Alpha-Synuclein-Specific T Cell Responses by Mediating Antigen Trafficking in Dendritic Cells
Source: PubMed Central journal article supplement (PMC8926036; doi:10.3389/fimmu.2022.833515), 2022-03-02

Original photo of immunoblot for Figure 6 A – Beclin1

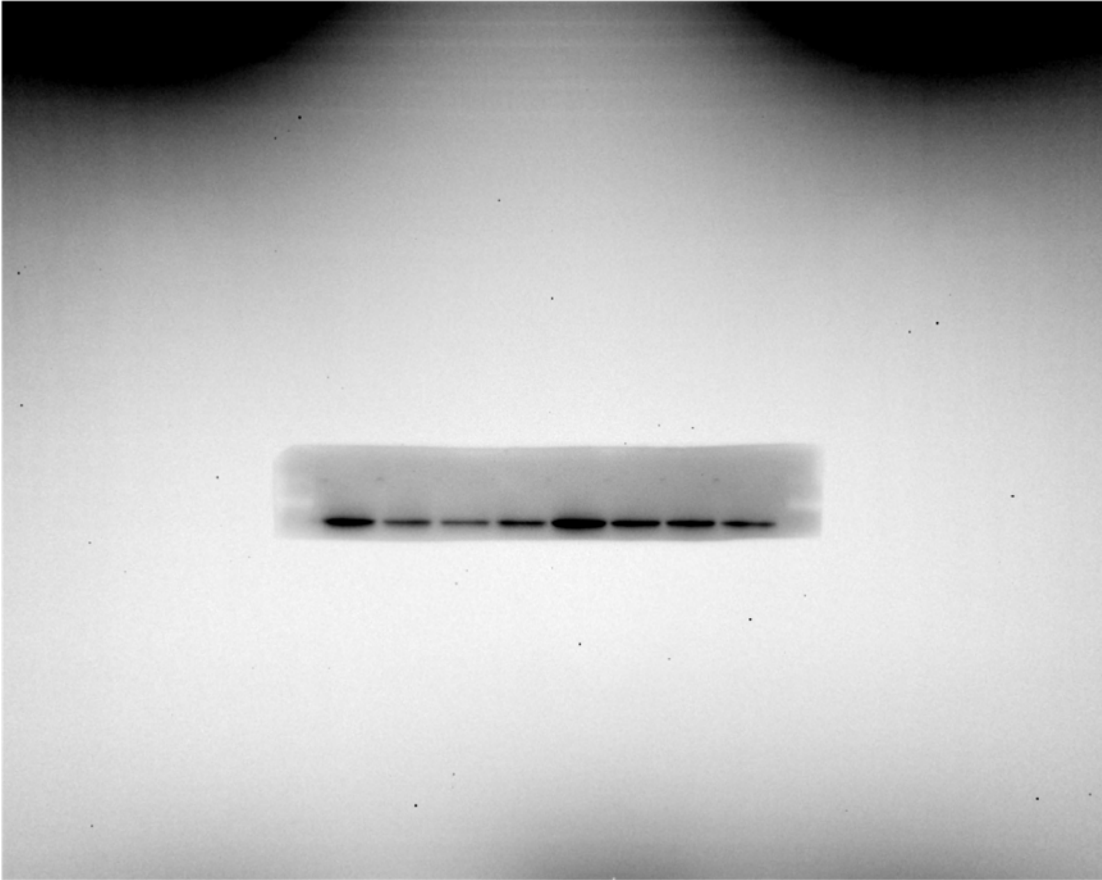

Original photo of immunoblot for Figure 6 A –  $\beta$ -actin

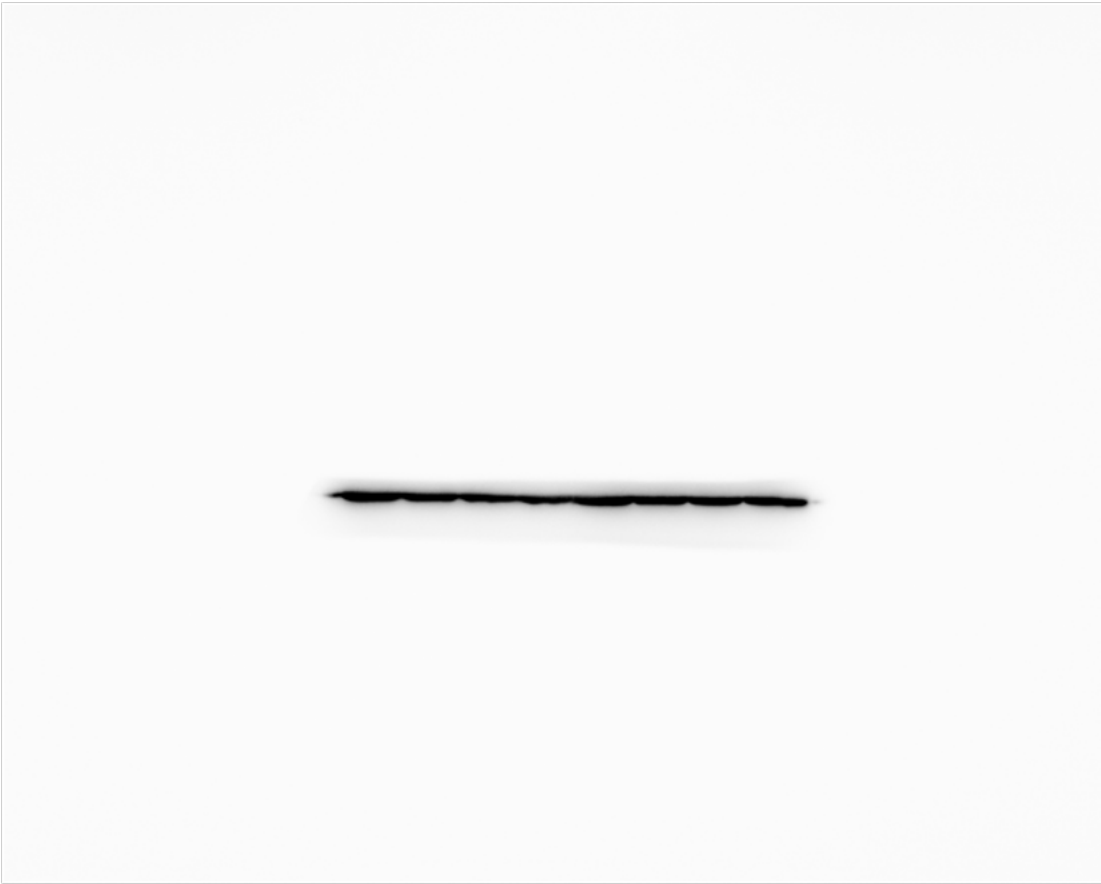

Original photo of immunoblot for Figure 6 C – LC3-I and LC3-II

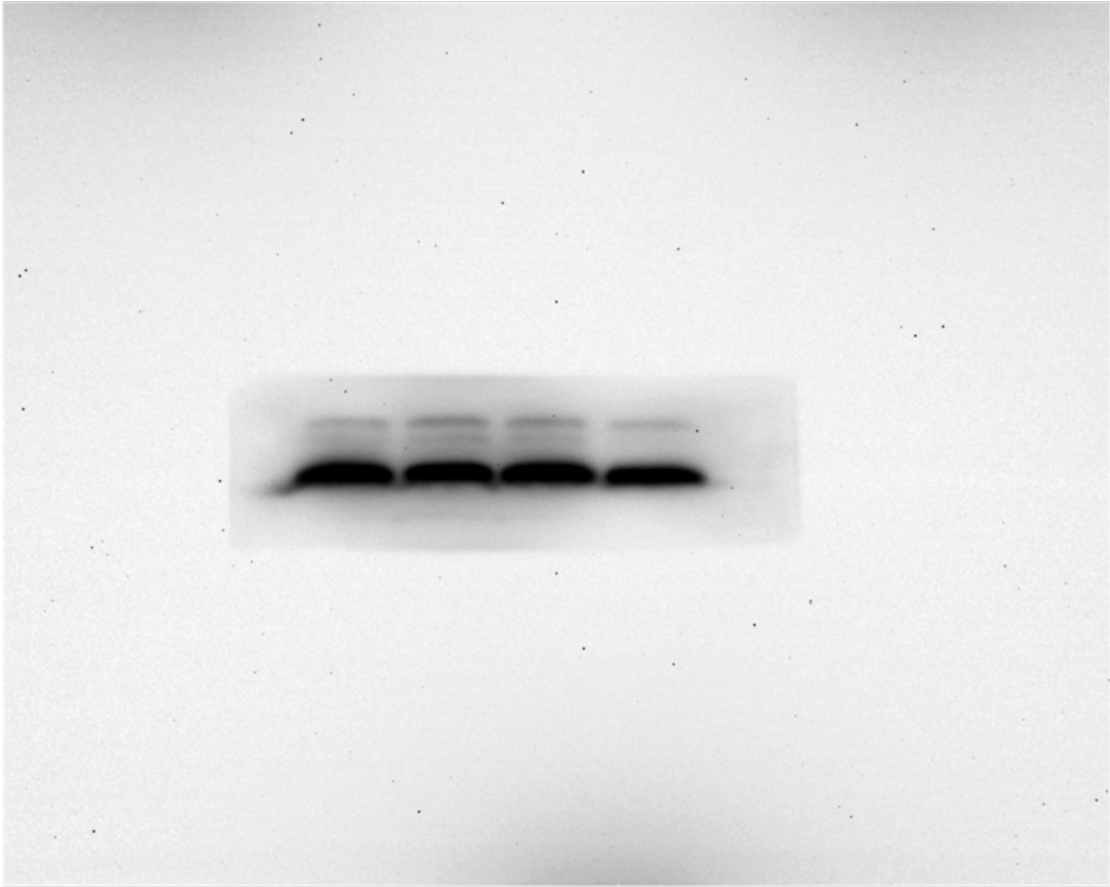

Original photo of immunoblot for Figure 6 C –  $\beta$ -actin

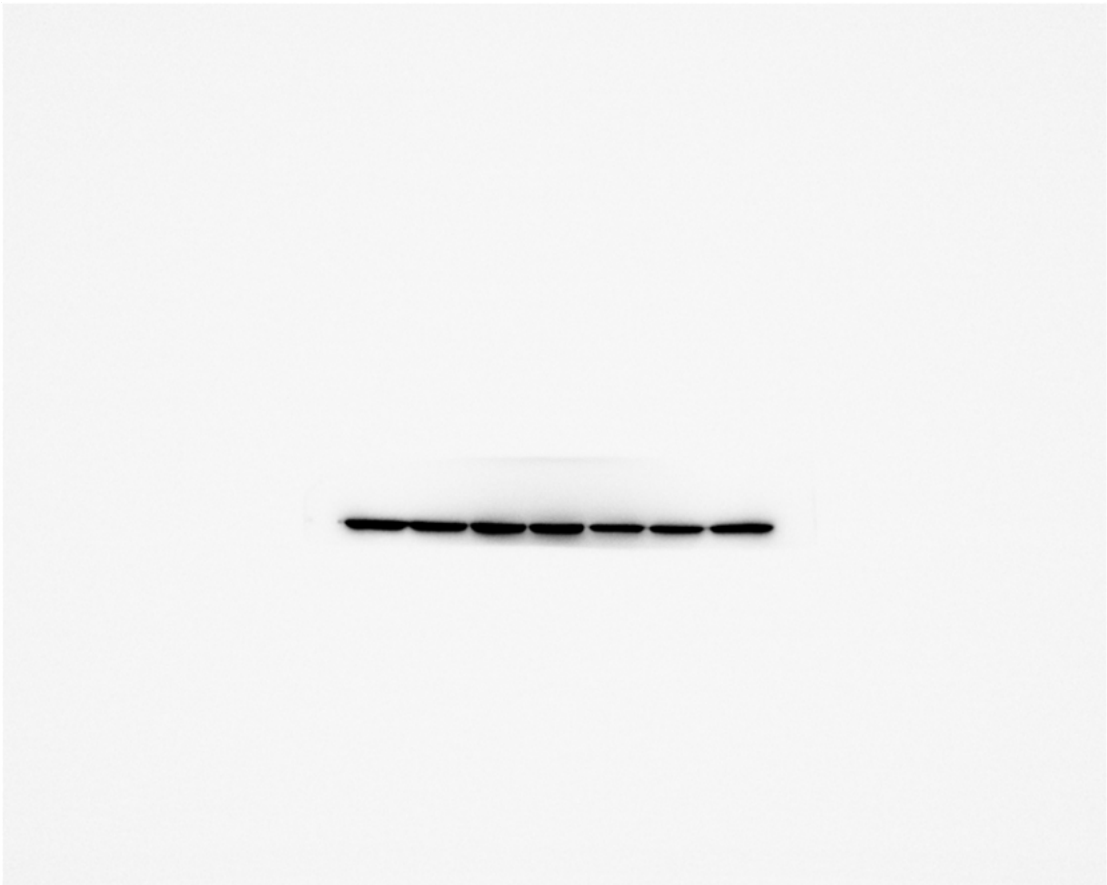

Original photo of immunoblot for Figure 6 G – Rab5-GTP

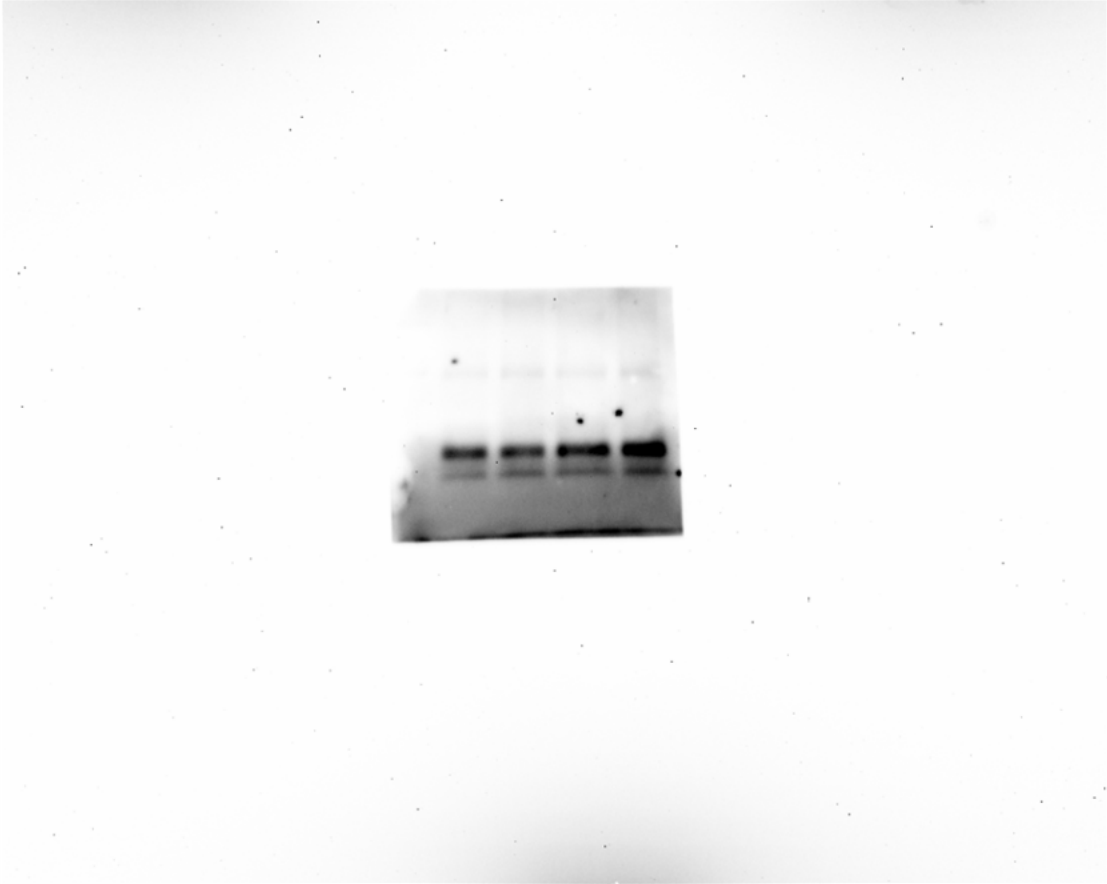

Original photo of immunoblot for Figure 6 G – Input

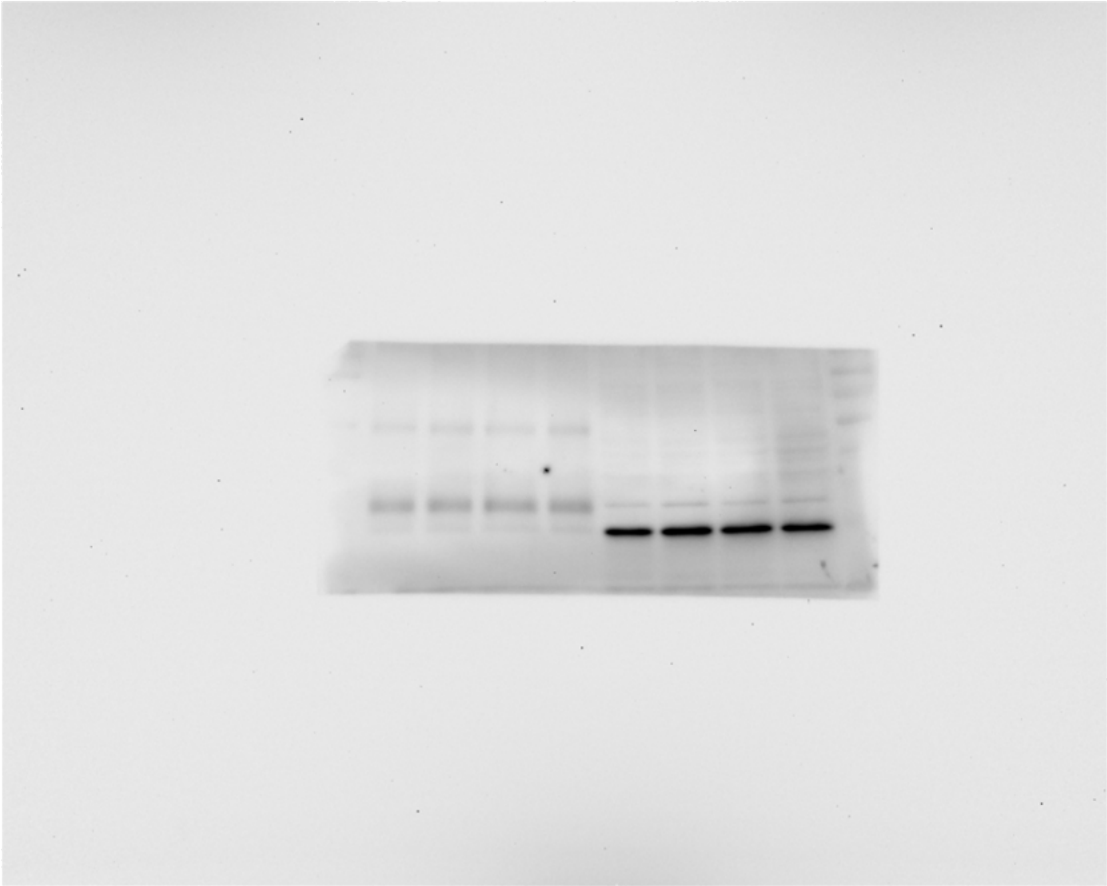

Original photo of immunoblot for Figure 6 H – Rab7-GTP

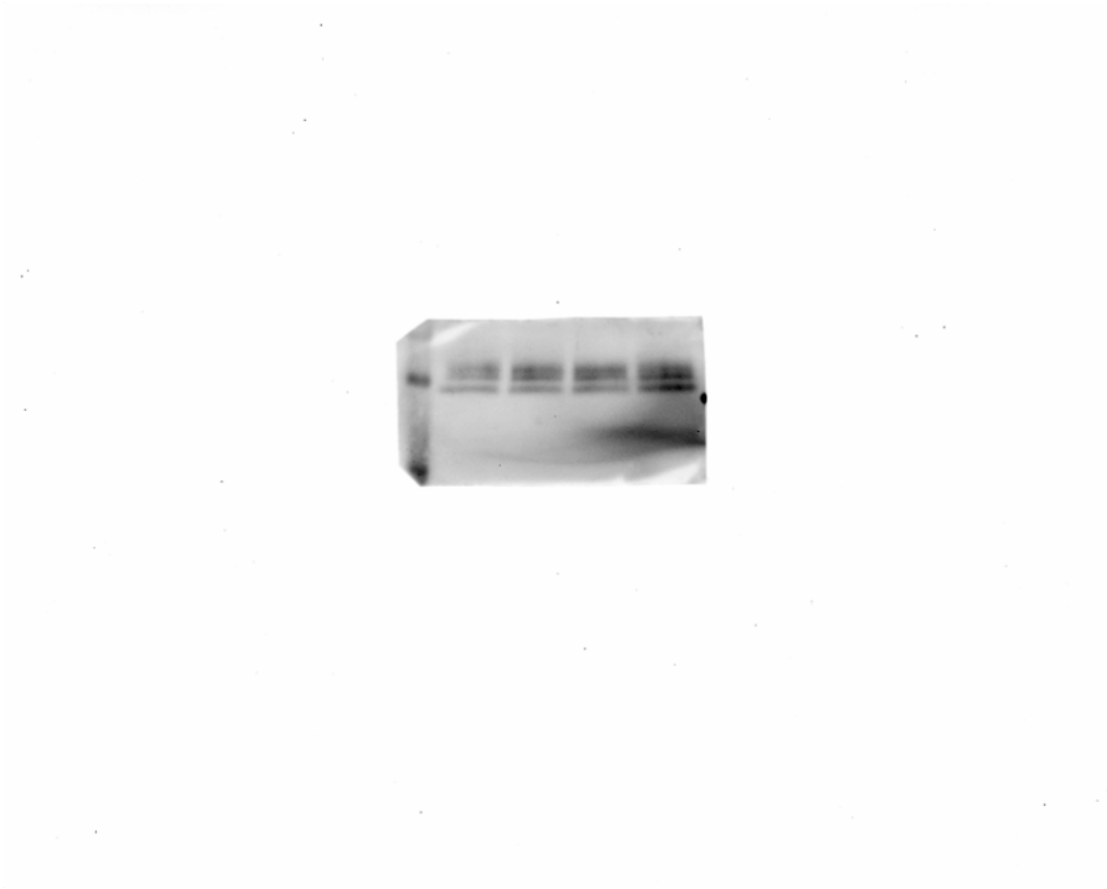

Original photo of immunoblot for Figure 6 H – Input

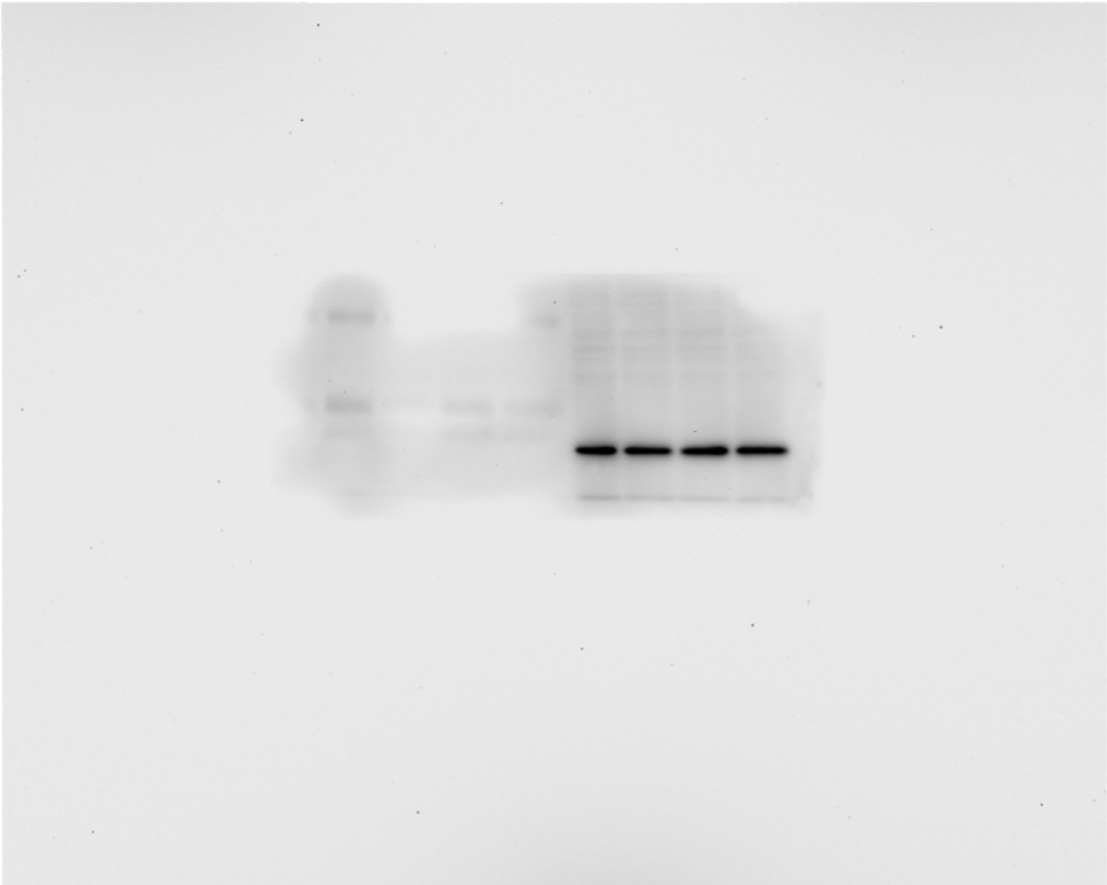



Original photo of immunoblot for Supp. Figure 9 C – p62

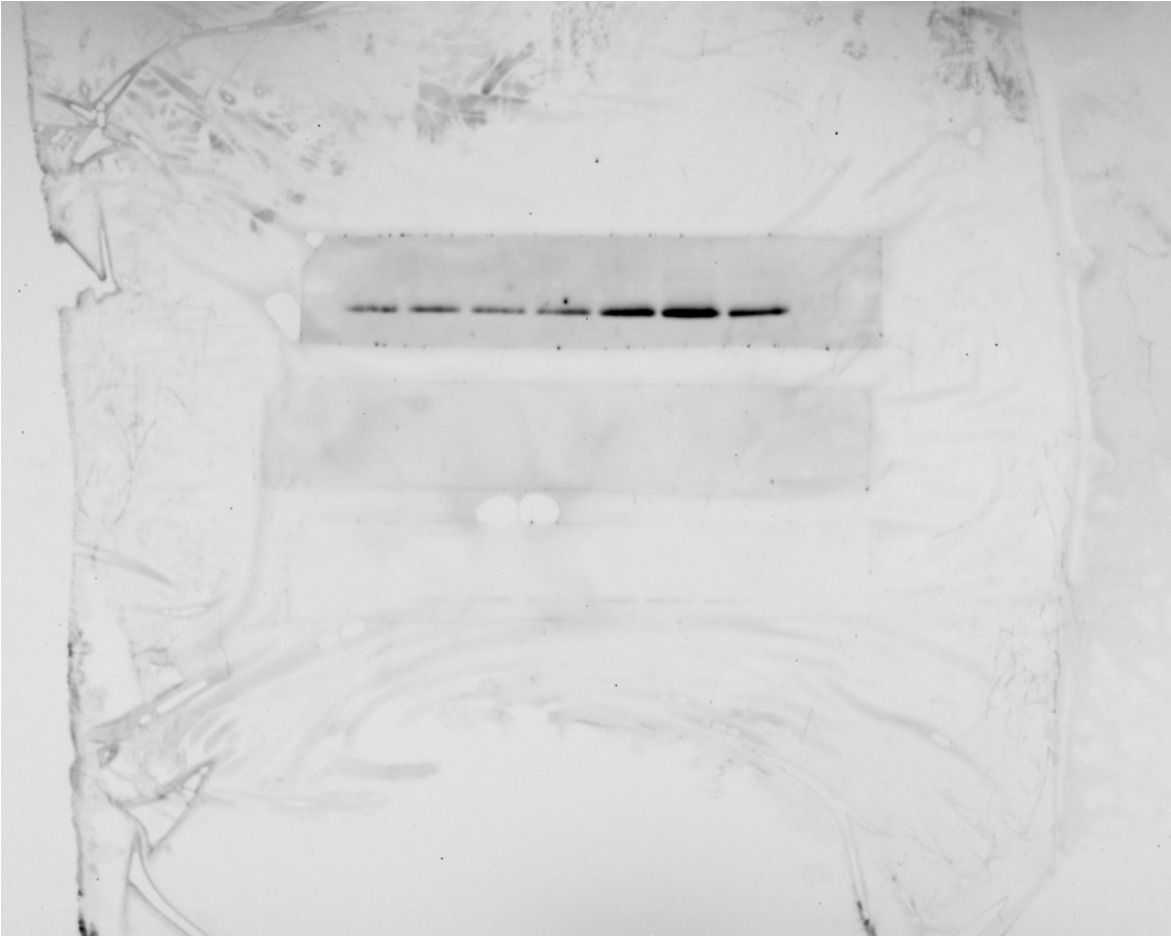

Supplement: Image_2.pdf [file Image_2.pdf]
